# GPT-2's activations predict the degree of semantic comprehension in the human brain

Charlotte Caucheteux<sup>1,2,\*</sup>, Alexandre Gramfort<sup>2</sup>, and Jean-Rémi King<sup>1,3</sup>

<sup>1</sup>Facebook AI Research, Paris, France; <sup>2</sup>Université Paris-Saclay, Inria, CEA, Palaiseau, France; <sup>3</sup>École normale supérieure, PSL University, CNRS, Paris, France

1 **Language transformers, like GPT-2, have demonstrated remark-**  
2 **able abilities to process text, and now constitute the backbone of**  
3 **deep translation, summarization and dialogue algorithms. However,**  
4 **whether these models encode information that relates to human com-**  
5 **prehension remains controversial. Here, we show that the represen-**  
6 **tations of GPT-2 not only map onto the brain responses to spoken**  
7 **stories, but also predict the extent to which subjects understand nar-**  
8 **ratives. To this end, we analyze 101 subjects recorded with func-**  
9 **tional Magnetic Resonance Imaging while listening to 70 min of short**  
10 **stories. We then fit a linear model to predict brain activity from**  
11 **GPT-2's activations, and correlate this mapping with subjects' com-**  
12 **prehension scores as assessed for each story. The results show that**  
13 **GPT-2's brain predictions significantly correlate with semantic com-**  
14 **prehension. These effects are bilaterally distributed in the language**  
15 **network and peak with a correlation of  $R=0.50$  in the angular gyrus.**  
16 **Overall, this study paves the way to model narrative comprehension**  
17 **in the brain through the lens of modern language algorithms.**

Neuroscience of language | Deep Neural Networks

1 **I**n less than two years, language transformers like GPT-2  
2 have revolutionized the field of natural language processing  
3 (NLP). These deep learning architectures are typically trained  
4 on very large corpora to complete partially-masked texts, and  
5 provide a one-fit-all solution to translation, summarization,  
6 and question-answering tasks and algorithms (1).

7 Critically, their hidden representations have been shown to  
8 – at least partially – correspond to those of the brain: single-  
9 sample fMRI (2–4), MEG (2, 4), and intracranial responses to  
10 spoken and written texts (3, 5) can be significantly predicted  
11 from a linear combination of the hidden vectors generated  
12 by these deep networks. Furthermore, the quality of these  
13 predictions directly depends on the models' ability to complete  
14 text (3, 4).

15 In spite of these achievements, strong doubts subsist on  
16 whether language transformers actually encode meaningful  
17 constructs (6). When asked to complete "I had \$20 and gave  
18 \$10 away. Now, I thus have \$", GPT-2 predicts "20\*". Simi-  
19 lar trivial errors can be observed for geographical locations,  
20 temporal ordering, pronoun attribution and causal reasoning.  
21 These results have thus led some to argue that such "system  
22 has no idea what it is talking about" (7). Thus, how the rep-  
23 resentations of GPT-2 relate to a human-like understanding  
24 remains largely unknown.

25 Here, we propose to evaluate how the similarity between the  
26 brain and GPT-2 vary with semantic comprehension. Specifi-  
27 cally, we first compare GPT-2's activations to the functional  
28 Magnetic Resonance Imaging of 101 subjects listening to  
29 70 min of seven short stories, and we quantify this similar-  
30 ity with a "brain score" ( $\mathcal{M}$ ) (8, 9). Second, we evaluate how

the brain scores systematically vary with semantic comprehen-  
sion, as individually assessed by a questionnaire at the end of  
each story.

**GPT-2's activations linearly map onto fMRI responses to spoken nar-**  
34 **ratives.** To assess whether GPT-2 generates similar represen-  
35 tations to those of the brain, we first evaluate, for each voxel,  
36 subject and narrative independently, whether the fMRI re-  
37 sponses can be predicted from a linear combination of GPT-2's  
38 activations (Figure 1A). We summarize the precision of this  
39 mapping with a brain score  $\mathcal{M}$ : i.e. the correlation between  
40 the true fMRI responses and the fMRI responses linearly pre-  
41 dicted, with cross-validation, from GPT-2's responses to the  
42 same narratives (cf. Methods). To mitigate fMRI spatial  
43 resolution and the necessity to correct each observation by  
44 the number of statistical comparisons, we here report either 1)  
45 the average brain scores across voxels or 2) the average score  
46 within each region of interest ( $n = 314$ , following an automatic  
47 subdivision of Destrieux atlas (10), cf. SI.1). Consistent with  
48 previous findings (2, 4, 11, 12), these brain scores are signif-  
49 icant over a distributed and bilateral cortical network, and  
50 peak in middle- and superior-temporal gyri and sulci, as well  
51 as in the supra-marginal and the infero-frontal cortex (2, 4, 11)  
52 (Figure 1B).

53 By extracting GPT-2 activations from multiple layers (from  
54 layer one to layer twelve), we confirm that middle layers best  
55 map onto the brain (Figure 1C), as seen in previous studies  
56 (2, 4, 11). For clarity, the following analyses focus on the  
57 activations extracted from the *eighth* layer, i.e. GPT-2's most  
58 "brain-like" layer (Figure 1B).

**GPT-2's brain predictions correlate with semantic comprehension.**  
60 Does the linear mapping between GPT-2 and the brain reflect  
61 a fortunate correspondence (4)? Or, on the contrary, does  
62 it reflect similar representations of high-level semantics? To  
63 address this issue, we correlate these brain scores to the level of  
64 comprehension of the subjects, assessed for each subject-story  
65 pair. On average across all voxels, this correlation reaches  
66  $\mathcal{R} = 0.50$  ( $p < 10^{-15}$ , Figure 1D, as assessed across subject-  
67 story pairs with the Pearson's test provided by SciPy). This  
68 correlation is significant across a wide variety of the bilateral  
69 temporal, parietal and prefrontal cortices typically linked to  
70 language processing (Figure 1E). Together, these results sug-  
71 gest that the shared representations between GPT-2 and the  
72 brain reliably vary with semantic comprehension.

**Low-level processing only partially accounts for the correlation be-**  
74 **tween comprehension and GPT-2's mapping** Low-level speech  
75 representations typically vary with attention (13, 14), and  
76 could thus, in turn, influence down-stream comprehension  
77 processes. Consequently, one can legitimately wonder whether  
78

\*as assessed using Huggingface interface (<https://github.com/huggingface/transformers>) and GPT-2 pretrained model with temperature=0.

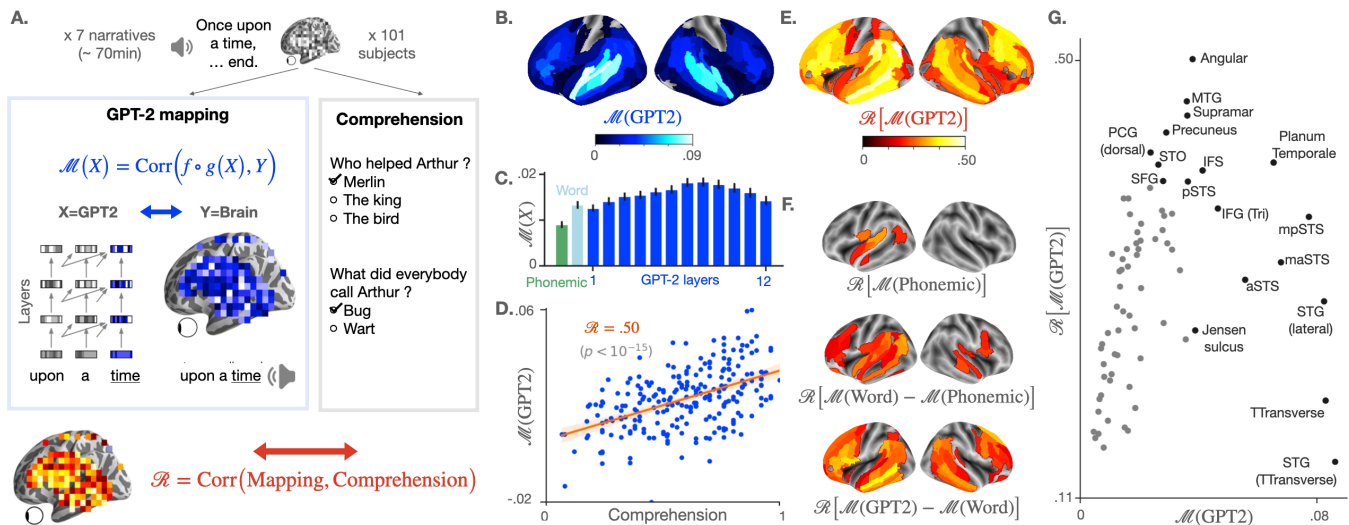

**Fig. 1.** **A.** 101 subjects listen to narratives (70 min of unique audio stimulus in total) while their brain signal is recorded using functional MRI. At the end of each story, a questionnaire is submitted to each subject to assess their understanding, and the answers are summarized into a comprehension score specific to each (narrative, subject) pair (grey box). In parallel (blue box on the left), we measure the mapping between the subject's brain activations and the activations of GPT-2, a deep network trained to predict a word given its past context, both elicited by the same narrative. To this end, a linear spatio-temporal model ( $f \circ g$ ) is fitted to predict the brain activity of one voxel  $Y$ , given GPT-2 activations  $X$  as input. The degree of mapping, called "brain score" is defined for each voxel as the Pearson correlation between predicted and actual brain activity on held-out data (blue equation, cf. Methods). Finally, we test the correlation between the comprehension scores of the subjects and their corresponding brain scores using Pearson's correlation (red equation). A positive correlation means that the representations shared across the brain and GPT-2 are key for the subjects to understand a narrative. **B.** Brain scores (fMRI predictability) of the activations of the eighth layer of GPT-2. Scores are averaged across subjects, narratives, and voxels within brain regions (142 regions in each hemisphere, following a subdivision of Destrieux Atlas (10), cf. SI.1). Only significant regions are displayed, as assessed with a two-sided Wilcoxon test across (subject, narrative) pairs, testing whether the brain score is significantly different from zero (threshold: .05). **C.** Brain scores, averaged across fMRI voxels, for different activation spaces: phonological features (word rate, phoneme rate, phonemes, tone and stress, in green), the non-contextualized word embedding of GPT-2 ("Word", light blue) and the activations of the contextualized layers of GPT-2 (from layer one to layer twelve, in blue). The error bars refer to the standard error of the mean across (subject, narrative) pairs ( $n=237$ ). **D.** Comprehension and GPT-2 brain scores, averaged across voxels, for each (subject, narrative) pair. In red, Pearson's correlation between the two (denoted  $\mathcal{R}$ ), the corresponding regression line and the 95% confidence interval of the regression coefficient. **E.** Correlations ( $\mathcal{R}$ ) between comprehension and brain scores over regions of interest. Brain scores are first averaged across voxels within brain regions (similar to B.), then correlated to the subjects' comprehension scores. Only significant correlations are displayed (threshold: .05). **F.** Correlation scores ( $\mathcal{R}$ ) between comprehension and the subjects' brain mapping with phonological features ( $\mathcal{M}(\text{Phonemic})$ ) (i), the share of the word-embedding mapping that is not accounted by phonological features  $\mathcal{M}(\text{Word}) - \mathcal{M}(\text{Phonemic})$  (ii) and the share of the GPT-2 eighth layer's mapping not accounted by the word-embedding  $\mathcal{M}(\text{GPT2}) - \mathcal{M}(\text{Word})$  (iii). **G.** Relationship between the average GPT-2-to-brain mapping (eighth layer) per region of interest (similar to B.), and the corresponding correlation with comprehension ( $\mathcal{R}$ , similar to D.). Only regions of the left hemisphere, significant in both B. and E. are displayed. In black, the top ten regions in terms of brain and correlation scores (cf. SI.1 for the acronyms). Significance in D, E and F is assessed with Pearson's p-value provided by SciPy<sup>†</sup>. In B, E and F, p-values are corrected for multiple comparison using a False Discovery Rate (Benjamin/Hochberg) over the  $2 \times 142$  regions of interest.

79 the correlation between comprehension and GPT-2's brain  
 80 mapping is simply driven by variations in low-level auditory  
 81 processing. To address this issue, we evaluate the predictabil-  
 82 ity of fMRI given low-level phonological features: the word  
 83 rate, phoneme rate, phonemes, stress and tone of the narrative  
 84 (cf. Methods). The corresponding brain scores correlate with  
 85 the subjects' understanding ( $\mathcal{R} = 0.17, p < 10^{-2}$ ) but less so  
 86 than the brain scores of GPT-2 ( $\Delta\mathcal{R} = 0.32$ ). These low-level  
 87 correlations with comprehension peak in the left superior tem-  
 88 poral cortex (Figure 1F). Overall, this result suggests that the  
 89 link between comprehension and GPT-2's brain mapping may  
 90 be partially explained by – but not reduced to – the variations  
 91 of low-level auditory processing.

92 **The reliability of high-level representations best predict comprehen-**  
 93 **sion** Is the correlation between comprehension and GPT-2's  
 94 mapping driven by a *lexical* process and/or by an ability to  
 95 meaningfully *combine* words? To tackle this issue, we compare  
 96 the correlations obtained from GPT-2's word embedding (i.e.  
 97 layer 0) to those obtained from GPT-2's eighth layer, i.e. a  
 98 contextual embedding. On average across voxels, the correla-  
 99 tion with comprehension is 0.12 lower with GPT-2's word  
 100 embedding than with its contextual embedding. An analogous  
 101 analysis, comparing word embedding to phonological features

is displayed in 1F. Strictly lexical effects (word-embedding  
 102 *versus* phonological) peak in the superior-temporal lobe and  
 103 in pars triangularis. By contrast, higher-level effects (GPT-2  
 104 eighth layer *versus* word-embedding) peak in the superior-  
 105 frontal, posterior superior-temporal gyrus, in the precuneus  
 106 and in both the triangular and opercular parts of the inferior  
 107 frontal gyrus – a network typically associated with high-level  
 108 language comprehension (4, 15–19).  
 109

#### 110 **Comprehension effects are mainly driven by individuals' variability**

The variability in comprehension scores could result from  
 111 exogenous factors (e.g. some stories may be harder to com-  
 112 prehend than others for GPT-2) and/or from endogeneous  
 113 factors (e.g. some subjects may better understand specific  
 114 texts because of their prior knowledge). To address this issue,  
 115 we fit a linear mixed model to predict comprehension scores  
 116 given brain scores, specifying the narrative as a random effect  
 117 (cf. SI.1). The fixed effect of brain score (shared across nar-  
 118 ratives) is highly significant:  $\beta = 0.04, p < 10^{-29}$ , cf. SI.1).  
 119 However, the random effect (slope specific to each single nar-  
 120 rative) is not ( $\beta < 10^{-2}, p > 0.11$ ). We also replicate the  
 121 main analysis (Figure 1D) within each single narrative: the  
 122 correlation with comprehension reaches 0.76 for the 'sherlock'  
 123 story and is above 0.40 for every story (cf. SI.1). Overall,  
 124

125 these analyses confirm that the link between GPT-2 and semantic  
126 comprehension is mainly driven by subjects' individual  
127 differences in their ability to make sense of the narratives.

128 **Discussion** Our analyses reveal a positive correlation between  
129 semantic comprehension and the degree to which GPT-2 maps  
130 onto brain responses to spoken narratives.

131 These results strengthen and complete prior work on the  
132 brain bases of semantic comprehension. In particular, previous  
133 studies have used inter-subject brain correlation to reveal the  
134 brain regions associated with understanding (17). For example,  
135 Lerner et al. recorded subjects' fMRI while they listened  
136 to normal texts or texts scrambled at the word, sentence or  
137 paragraph level, in order to parametrically manipulate their  
138 level of comprehension (15). The corresponding fMRI signals  
139 correlated across subjects in the primary and secondary auditory  
140 areas even when the input was scrambled below the lexical  
141 level. By contrast, fMRI signals also became correlated in the  
142 bilateral infero-frontal and temporo-parietal cortex when the  
143 scrambling was either not performed, or performed at the level  
144 of sentences and paragraphs. Our results are consistent with  
145 this hierarchical organization, and thus make an important  
146 step towards the development of a cerebral model of narrative  
147 comprehension.

148 The relationship between GPT-2's representations and human  
149 comprehension remains to be qualified. First, although highly  
150 significant, our brain scores are relatively low (2, 9, 17). This  
151 phenomenon likely results from a mixture of different elements:  
152 i) we ran our analyses across *all* voxels to avoid selection  
153 biases, which automatically reduces the average effect sizes  
154 and ii) we report the results without correcting for a noise  
155 ceiling (cf. SI.1), as our pilot analyses suggest that such  
156 noise-ceiling can greatly vary depending on how it is  
157 implemented (i.e. fit from mean across subjects, from all or  
158 on voxels etc). Second, the correlation between semantic  
159 comprehension and GPT-2's mapping is robust ( $p < 10^{-15}$ ) but  
160 far from perfect ( $R = 0.50$ ). Such correlation thus indicates  
161 that the modeling of brain responses with GPT-2 does not *fully*  
162 account for the variation in comprehension. While this result  
163 is expected (7), our study provides a promising framework to  
164 evaluate the extent to which deep language models represent  
165 and understand texts like we do.

166 Finally, our results suggest that the neural bases of  
167 comprehension relate to the *high-level* representations of deep  
168 language models. While the mapping of phonological features  
169 and word embeddings do correlate with comprehension, GPT-2's  
170 contextual embeddings provides brain maps that more reliably  
171 predict comprehension (Figure 1F). The superiority of  
172 contextual-embedding in predicting comprehension suggests that  
173 i) GPT-2 encodes features supporting comprehension and ii) our  
174 findings are not solely driven by low- or mid-level processing  
175 (13, 14). These elements remain solely based on correlations,  
176 however. The factors that *causally* influence comprehension,  
177 ranging from prior knowledge, attention and language  
178 complexity should be explicitly manipulated in future work.  
179

180 Overall, the present study strengthens and clarifies the  
181 similarity between the brain and deep language models, repeatedly  
182 observed in the past three years (2-4, 11, 20). Together, these  
183 findings reinforce the relevance of deep language models in  
184 unraveling the neural bases of narrative comprehension.

## 185 Materials and Methods

186  
187 Our analyses rely on the "Narratives" dataset (21), composed of  
188 the brain signals, recorded using fMRI, of 345 subjects listening to  
189 27 narratives.

190 **Narratives and comprehension score** Among the 27 stories of the  
191 dataset, we selected the seven stories for which subjects were  
192 asked to answer a comprehension questionnaire at the end, and  
193 for which the answers varied across subjects (more than ten  
194 different comprehension scores across subjects), resulting in  
195 70 minutes of audio stimuli in total, from four to 19 minutes  
196 per story (Figure 2). Questionnaires were either multiple-choice,  
197 fill-in-the-blank, or open questions (answered with free text)  
198 rated by humans (21). Here, we used the comprehension score  
199 computed in the original dataset which was either a proportion  
200 of correct answers or the sum of the human ratings, scaled  
201 between 0 and 1 (21). It summarizes the comprehension of  
202 one subject for one narrative (specific to each (narrative, subject) pair).

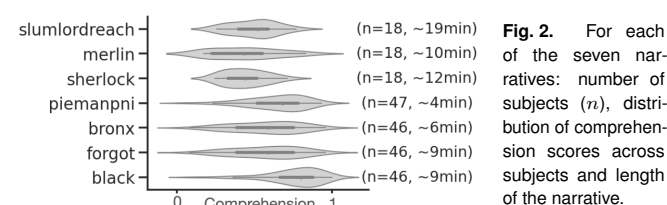

203 **Fig. 2.** For each of the seven narratives: number of subjects ( $n$ ), distribution of comprehension scores across subjects and length of the narrative.

204 **Brain activations** The brain activations of the 101 subject who  
205 listened to the selected narratives were recorded using fMRI, as  
206 described in (21). As suggested in the original paper, pairs of (subject,  
207 narrative) were excluded because of noisy recordings, resulting in  
208 237 pairs in total.

209 **GPT-2 activations** GPT-2 (1) is a high-performing neural language  
210 model trained to predict a word given its previous context (it does  
211 not have access to succeeding words), given millions of examples  
212 (e.g. Wikipedia texts). It consists of multiple Transformer modules  
213 (twelve, each of them called "layer") stacked on a non-contextual  
214 word embedding (a look-up table that outputs a single vector per  
215 vocabulary word) (1). Each layer  $l$  can be seen as a nonlinear  
216 system that takes a sequence of  $w$  words as input, and outputs  
217 a contextual vector of dimension  $(w, d)$ , called the "activations"  
218 of layer  $l$  ( $d = 768$ ). Intermediate layers were shown to better  
219 encode syntactic and semantic information than input and output  
220 layers (22), and to better map onto brain activity (2, 4). Here,  
221 we show that the *eighth* layer of GPT-2 best predicts brain activity  
222 1C. We thus select the eighth layer of GPT-2 for our analyses.  
223 Our conclusions remain unchanged with other intermediate-to-deep  
224 layers of GPT-2 (from  $6^{th}$  to  $12^{th}$  layers).

225 In practice, the narratives' transcripts were formatted (replacing  
226 special punctuation marks such as "-" and duplicated marks "?" by  
227 dots), tokenized using GPT-2 tokenizer and input to the GPT-2  
228 pretrained model provided by Huggingface ‡. The representation of  
229 each token is computed separately using a context window a 1024.  
230 For instance, to compute the representation of the third token of  
231 the story, we input GPT-2 with the third, second and first token,  
232 and then extract the activations corresponding to the third token.  
233 To compute the representation of a token  $w_k$  at the end of the  
234 story, GPT-2 is input with this token combined with the 1,023  
235 preceding tokens. Then, we extract the activations corresponding  
236 to  $w_k$ . The procedure results in a vector of activations of size  $(w, d)$   
237 with  $w$  the number of tokens in the story and  $d$  the dimensionality  
238 of the model. There are fewer fMRI scans than words. Thus,  
239 the activation vectors between successive fMRI measurements are  
240 summed to obtain one vector of size  $d$  per measurement. To match  
241 the fMRI measurements and the GPT-2 vectors over time, we used  
242 the speech-to-text correspondences provided in the fMRI dataset  
(21).

‡ <https://github.com/huggingface/transformers>

243 **Linear mapping between GPT-2 and the brain** For each (subject,  
244 narrative) pair, we measure the mapping between i) the fMRI  
245 activations elicited by the narrative and ii) the activations of GPT-2  
246 (layer nine) elicited by the same narrative. To this end, a linear  
247 spatiotemporal model is fitted on a train set to predict the fMRI  
248 scans given the GPT-2 activations as input. Then, the mapping is  
249 evaluated by computing the Pearson correlation between predicted  
250 and actual fMRI scans on a held out set  $I$ :

$$251 \quad \mathcal{M}^{(s,w)} : I \mapsto \mathcal{L} \left( f \circ g(X^{(w)})_{i \in I}, (Y_i^{(s,w)})_{i \in I} \right) \quad [1]$$

252 With  $f \circ g$  the fitted estimator ( $g$ : temporal and  $f$ : spatial  
253 mappings),  $\mathcal{L}$  Pearson's correlation,  $X^{(w)}$  the activations of GPT-2  
254 and  $Y^{(s,w)}$  the fMRI scans of subjects  $s$ , both elicited by the  
255 narrative  $w$ .

256 In practice,  $f$  is a  $\ell_2$ -penalized linear regression. We follow scikit-  
257 learn implementation<sup>§</sup> with ten possible regularization parameters  
258 log-spaced between  $10^{-1}$  and  $10^8$ , one optimal parameter per voxel  
259 and leave-one-out cross-validation.  $g$  is a finite impulse response  
260 (FIR) model with 5 delays, where each delay sums the activations  
261 of GPT-2 input with the words presented between two TRs. For  
262 each (subject, narrative) pair, we split the corresponding fMRI time  
263 series into five contiguous chunks using scikit-learn cross-validation.  
264 The procedure is repeated across the five train (80% of the fMRI  
265 scans) and disjoint test folds (20% of the fMRI scans). Pearson  
266 correlations are averaged across folds to obtain a single score per  
267 (subject, narrative) pair. This score, denoted  $\mathcal{M}(X)$  in Figure 1A,  
268 measures the mapping between the activations space  $X$  and the  
269 brain of one subject, elicited by one narrative.

270 **Phonological features** To account for low-level speech processing,  
271 we computed the alignment (Eq. (1)) between the fMRI brain recordings  
272  $Y$  and phonological features  $X$ : the word rate (of dimension  
273  $d = 1$ , the number of words per fMRI scan), the phoneme rate  
274 ( $d = 1$ , the number of phonemes per fMRI scan) and the concatenation  
275 of phonemes, stresses and tones of the words in the stimuli  
276 (categorical feature,  $d = 117$ ). The latter features are provided in  
277 the original Narratives database (21), and computed using Gentle<sup>¶</sup>  
278 forced-alignment algorithm.

279 **Significance** Significance was either assessed by using either (i) a  
280 second-level Wilcoxon test (two-sided) across subject-narrative pairs,  
281 testing whether the mapping (one value per pair) was significantly  
282 different from zero (Figure 1B), or (ii) by using the first-level Pearson  
283 p-value provided by SciPy<sup>||</sup> (Figure 1D-G). In Figure 1B, E, F, p-  
284 values were corrected for multiple comparison ( $2 \times 142$  ROIs) using  
285 False Discovery Rate (Benjamin/Hochberg)\*\*.

## 286 References

- 287 1. Alec Radford, Jeffrey Wu, Rewon Child, David Luan, Dario Amodei, and Ilya Sutskever. Language Models are Unsupervised Multitask Learners. page 24, 2018.  
288  
289 2. Mariya Toneva and Leila Wehbe. Interpreting and improving natural-language processing (in machines) with natural language-processing (in the brain). *arXiv:1905.11833 [cs, q-bio]*, November 2019. arXiv: 1905.11833.  
290  
291 3. Martin Schrimpf, Idan Blank, Greta Tuckute, Carina Kauf, Eghbal A. Hosseini, Nancy Kanwisher, Joshua Tenenbaum, and Evelina Fedorenko. Artificial Neural Networks Accurately Predict Language Processing in the Brain. *bioRxiv*, page 2020.06.26.174482, June 2020. . Publisher: Cold Spring Harbor Laboratory Section: New Results.  
292  
293 4. Charlotte Caucheteux and Jean-Rémi King. Language processing in brains and deep neural networks: computational convergence and its limits. *bioRxiv*, page 2020.07.03.186288, July 2020. . Publisher: Cold Spring Harbor Laboratory Section: New Results.  
294  
295 5. Ariel Goldstein, Zaid Zada, Eliav Buchnik, Mariano Schain, Amy Price, Bobbi Aubrey, Samuel A. Nastase, Amir Feder, Dotan Emanuel, Alon Cohen, Aren Jansen, Harshvardhan Gazula, Gina Choe, Aditi Rao, Catherine Kim, Colton Casto, Fanda Lora, Adeen Flinker, Sasha Devore, Werner Doyle, Patricia Dugan, Daniel Friedman, Avinatan Hassidim, Michael Brenner, Yossi Matias, Ken A. Norman, Orrin Devinsky, and Uri Hasson. Thinking ahead: prediction in context as a keystone of language in humans and machines. *bioRxiv*, page 2020.12.02.403477, January 2021. . Publisher: Cold Spring Harbor Laboratory Section: New Results.  
296  
297  
298  
299  
300  
301  
302  
303  
304  
305  
306

- 511 6. Yixin Nie, Adina Williams, Emily Dinan, Mohit Bansal, Jason Weston, and Douwe Kiela. Adversarial nli: A new benchmark for natural language understanding. *arXiv preprint arXiv:1910.14599*, 2019. 307  
308  
309  
512 7. Gary Marcus. Gpt-2 and the nature of intelligence. *The Gradient*, 2020. 310  
513 8. D. L. K. Yamins, H. Hong, C. F. Cadieu, E. A. Solomon, D. Seibert, and J. J. DiCarlo. Performance-optimized hierarchical models predict neural responses in higher visual cortex. *Proceedings of the National Academy of Sciences*, 111(23):8619–8624, June 2014. ISSN 0027-8424, 1091-6490. . 311  
312  
313  
314  
514 9. Alexander G. Huth, Wendy A. de Heer, Thomas L. Griffiths, Frédéric E. Theunissen, and Jack L. Gallant. Natural speech reveals the semantic maps that tile human cerebral cortex. *Nature*, 532(7600):453–458, April 2016. ISSN 0028-0836, 1476-4687. . 315  
316  
317  
515 10. Christophe Destrieux, Bruce Fischl, Anders Dale, and Eric Halgren. Automatic parcellation of human cortical gyri and sulci using standard anatomical nomenclature. *NeuroImage*, 53(1):1–15, October 2010. ISSN 1053-8119. . 318  
319  
320  
516 11. Shailee Jain and Alexander G Huth. Incorporating Context into Language Encoding Models for fMRI. preprint, Neuroscience, May 2018. 321  
322  
323  
517 12. Martin Schrimpf, Jonas Kubilius, Ha Hong, Najib J. Majaj, Rishi Rajalingham, Elias B. Issa, Kohitij Kar, Pouya Bashivan, Jonathan Prescott-Roy, Franziska Geiger, Kailyn Schmidt, Daniel L. K. Yamins, and James J. DiCarlo. Brain-Score: Which Artificial Neural Network for Object Recognition is most Brain-Like? preprint, Neuroscience, September 2018. 324  
325  
326  
518 13. Nima Mesgarani and Edward F. Chang. Selective cortical representation of attended speaker in multi-talker speech perception. *Nature*, 485(7397):233–236, May 2012. ISSN 1476-4687. . 327  
328  
329  
519 . Bandiera\_abtest: a Cg\_type: Nature Research Journals Number: 7397 Primary\_atype: Research Publisher: Nature Publishing Group Subject\_term: Auditory system:Neuronal physiology:Perception Subject\_term\_id: auditory-system;neuronal-physiology;perception. 330  
331  
332  
520 14. Laurent Cohen, Philippine Salondy, Christophe Pallier, and Stanislas Dehaene. How does inattention affect written and spoken language processing? *Cortex*, 138:212–227, 2021. 333  
334  
335  
521 15. Y. Lerner, C. J. Honey, L. J. Silbert, and U. Hasson. Topographic Mapping of a Hierarchy of Temporal Receptive Windows Using a Narrated Story. *Journal of Neuroscience*, 31(8):2906–2915, February 2011. ISSN 0270-6474, 1529-2401. . 336  
337  
338  
522 16. C. Pallier, A.-D. Devauchelle, and S. Dehaene. Cortical representation of the constituent structure of sentences. *Proceedings of the National Academy of Sciences*, 108(6):2522–2527, February 2011. ISSN 0027-8424, 1091-6490. . 339  
340  
341  
523 17. Evelina Fedorenko, Terri Scott, Peter Brunner, William Coon, Brianna Pritchett, Gerwin Schalk, and Nancy Kanwisher. Neural correlate of the construction of sentence meaning. *Proceedings of the National Academy of Sciences of the United States of America*, 113, September 2016. . 342  
343  
344  
524 18. Angela D. Friederici. The Brain Basis of Language Processing: From Structure to Function. *Physiological Reviews*, 91(4):1357–1392, October 2011. ISSN 0031-9333, 1522-1210. . 345  
346  
347  
525 19. Gregory Hickok and David Poeppel. The cortical organization of speech processing. *Nature Reviews Neuroscience*, 8(5):393–402, May 2007. ISSN 1471-0048. . Number: 5 Publisher: Nature Publishing Group. 348  
349  
350  
526 20. Jon Gauthier and Anna Ivanova. Does the brain represent words? An evaluation of brain decoding studies of language understanding. *arXiv:1806.00591 [cs]*, June 2018. arXiv: 1806.00591. 351  
352  
353  
527 21. Samuel A. Nastase, Yun-Fei Liu, Hanna Hillman, Asieh Zadbood, Liat Hasenfratz, Neggin Keshavarzian, Janice Chen, Christopher J. Honey, Yaara Yeshurun, Mor Regev, Mai Nguyen, Claire H. C. Chang, Christopher Baldassano, Olga Lositsky, Erez Simony, Michael A. Chow, Yuan Chang Leong, Paula P. Brooks, Emily Micciche, Gina Choe, Ariel Goldstein, Tamara Vandervel, Yaroslav O. Halchenko, Kenneth A. Norman, and Uri Hasson. Narratives: fMRI data for evaluating models of naturalistic language comprehension. preprint, Neuroscience, December 2020. 354  
355  
356  
528 22. Ganesh Jawahar, Benoît Sagot, and Djamel Seddah. What Does BERT Learn about the Structure of Language? In *Proceedings of the 57th Annual Meeting of the Association for Computational Linguistics*, pages 3651–3657, Florence, Italy, 2019. Association for Computational Linguistics. . 357  
358  
359  
360  
361  
362

§ <https://scikit-learn.org/>

¶ <https://github.com/lowerquality/gentle>

|| <https://www.scipy.org/>

\*\* <https://mne.tools/>

### 363 Supporting Information (SI)

364 **Brain parcellation.** In Figure 1B, E, and F, we used a subdivi-  
 365 sion of the parcellation from Destrieux Atlas (10). Regions  
 366 with more than 400 vertices were split into smaller regions (so  
 367 that each regions contains less than 400 vertices). The original  
 368 parcellation consists of 75 regions per hemisphere. Our custom  
 369 parcellation consists in 142 regions per hemisphere.

370 In Figure 1G, we use the original parcellation for simplicity,  
 371 and the following acronyms:

| Acronym            | Definition                                      |
|--------------------|-------------------------------------------------|
| STG / STS          | Superior temporal gyrus / sulcus                |
| aSTS               | Anterior STS                                    |
| maSTS              | Mid-anterior STS                                |
| mpSTS              | Mid-posterior STS                               |
| pSTS               | Posterior STS                                   |
| Angular / Supramar | Angular / Supramarginal inferior parietal gyrus |
| MTG / MTS          | Medial temporal gyrus / sulcus                  |
| SFG / SFS          | Superior frontal gyrus / sulcus                 |
| IFG / IFS          | Inferior frontal gyrus / sulcus                 |
| Tri / Op           | Pars triangularis / opercularis (IFG)           |
| TTransverse        | Temporal transverse sulcus                      |
| PCG                | Posterior cingulate gyrus                       |
| STO                | Temporo-occipital lateral sulcus                |

372 **Mixed-effect model.** Not all subjects listened to the same  
 373 stories. To check that the  $\mathcal{R}$  scores (correlation between compre-  
 374 hension and brain mapping) were not driven by the narratives  
 375 and questionnaires' variability, a linear mixed-effect model was  
 376 fit to predict the comprehension of a subject given its brain  
 377 mapping scores, specifying the narrative as a random effect.  
 378 More precisely, if  $w_i \in \mathbb{R}$  corresponds to the mapping scores  
 379 of the  $i^{\text{th}}$  subject that listened to the story  $w$ , and  $C_{w_i} \in \mathbb{R}$   
 380 refers to the comprehension scores, we estimate the fixed effect  
 381 parameters  $\beta \in \mathbb{R}$  and  $\tilde{\eta} \in \mathbb{R}$  (shared across narratives), and  
 382 the random effect parameter  $\beta_w \in \mathbb{R}$  and  $\eta_w \in \mathbb{R}$  (specific to  
 383 the narrative  $w$ ) such that:

$$384 \quad C_{w_i} = (\tilde{\beta} + \beta_w) \times w_i + (\tilde{\eta} + \eta_w) + \epsilon_{w_i}$$

385 with  $\epsilon_{w_i}$  a vector of i.i.d normal errors with mean 0 and vari-  
 386 ance  $\sigma^2$ . In practice, we use the statsmodels<sup>††</sup> implementation  
 387 of linear mixed-effect models. Significance of the coefficients  
 388 were assessed with a t-test, as implemented in statsmodels.

389 **Replication across single narratives.** To further support that  
 390 the  $\mathcal{R}$  were not driven by the narratives' variability, we repli-  
 391 cate the analysis of Figure 1D within single narratives. In  
 392 Figure 3, we show that correlation scores between brain scores  
 393 and comprehension scores are positive for each of the seven  
 394 narratives.

395 **Noise Ceiling Estimates.** fMRI recordings are inherently noisy.  
 396 Thus, we estimate an upper bound of the best brain score that  
 397 can be obtained given the level of noise in the Narrative dataset.  
 398 To this end, for each (subject, narrative) pair, we linearly  
 399 map the fMRI recordings, not with the GPT-2 activations,  
 400 but with the average fMRI recordings of the other subjects  
 401 who listened to that narrative. More precisely, we use the

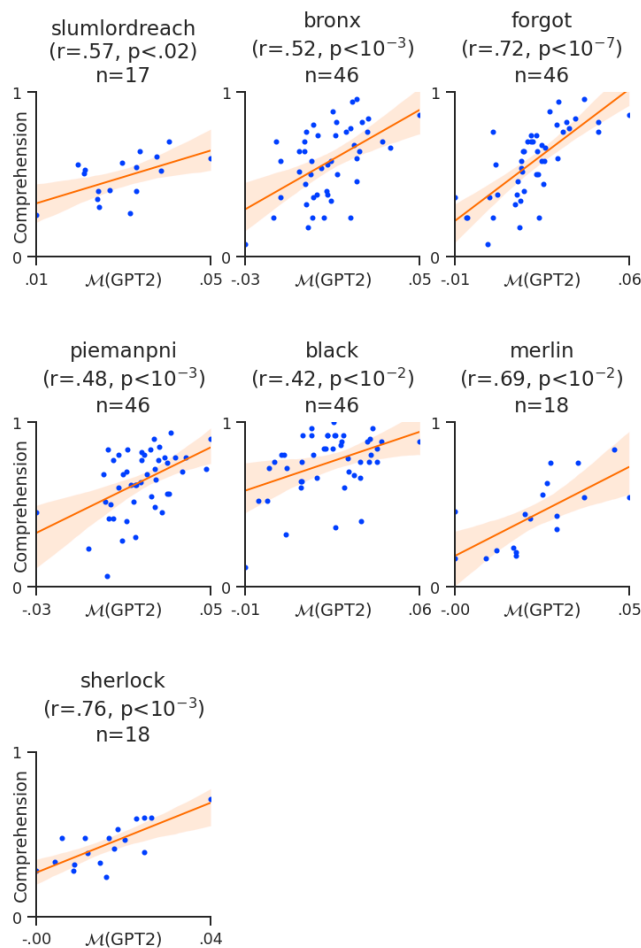

**Fig. 3. Replication within single narratives.** Same as Figure 1D for each single narrative.

402 exact same setting as in Eq. (1), but we predict  $Y^{(s)}$ , not  
 403 from  $g(X)$  (GPT-2's features after temporal alignment, of size  
 404  $n_{\text{times}} \times n_{\text{dim}}$ ), but from the mean of the other subject's brains  
 405  $\bar{Y} = \frac{1}{|\mathcal{S}|} \sum_{s' \neq s} Y^{(s')}$  (of size  $n_{\text{times}} \times n_{\text{voxels}}$ ). This score is  
 406 called the noise ceiling for the (subject, narrative) pair. The  
 407 noise ceilings for each brain region are displayed in Figure 4,  
 408 and correspond to upper bounds of the brain scores displayed  
 409 in Figure 1B.

<sup>††</sup> <https://www.statsmodels.org/>

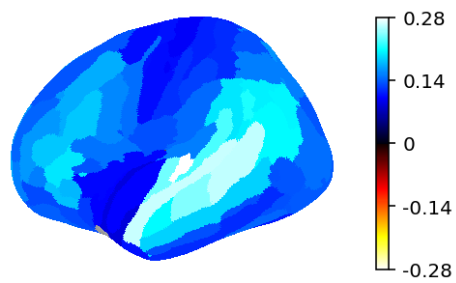

**Fig. 4. Noise ceiling estimates.** Noise ceilings averaged across subjects, narratives and voxels within each region of interest. They are upper bounds of the brain scores in Figure 1B.
